# Supplementary material
Source: publisher site journal article supplement (http://www.spandidos-publications.com/1479/downloadSupplementary)

Figure S1. OS data in all CTSL abnormally expressed malignancies. OS, overall survival; CTSL, cathepsin L.

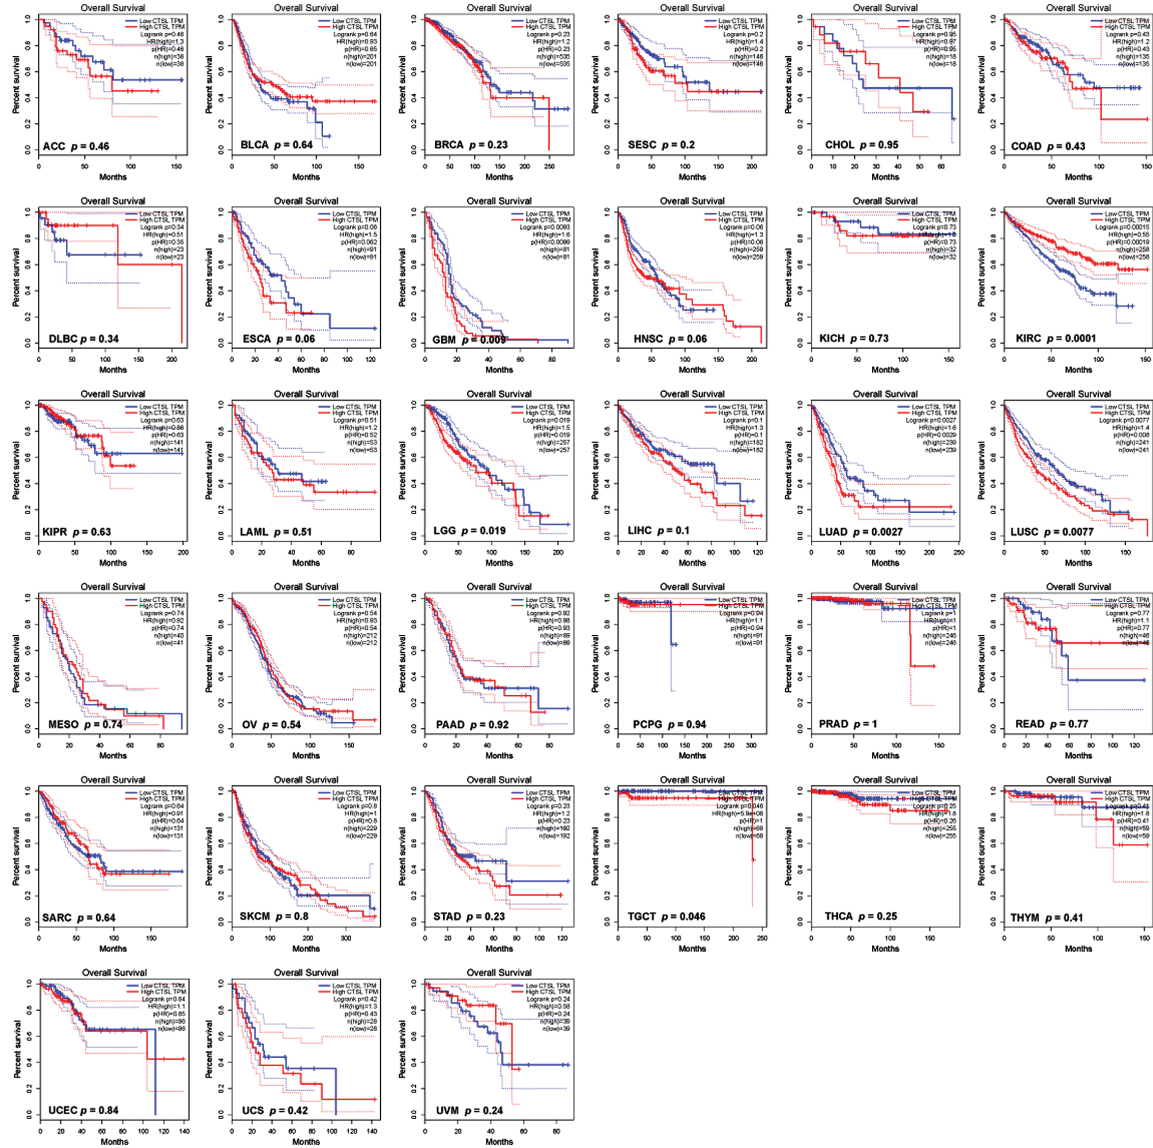

Figure S2. DNA methylation aberration of CTSL in all tumors. CTSL, cathepsin L.

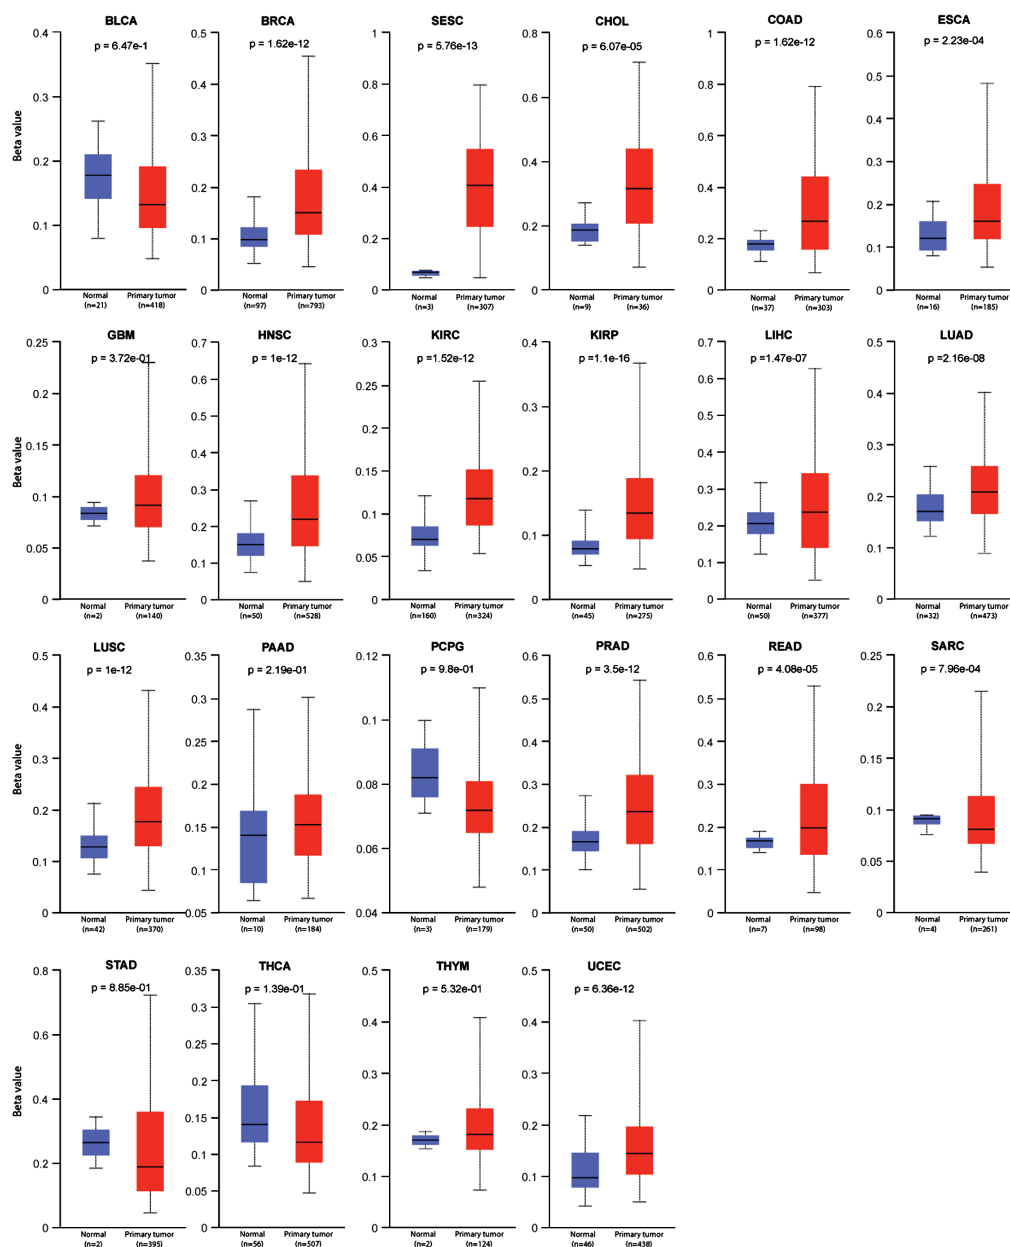

Figure S3. OS data in all TMRSS2 abnormally expressed malignancies. OS, overall survival; TMRSS2, transmembrane protease serine 2.

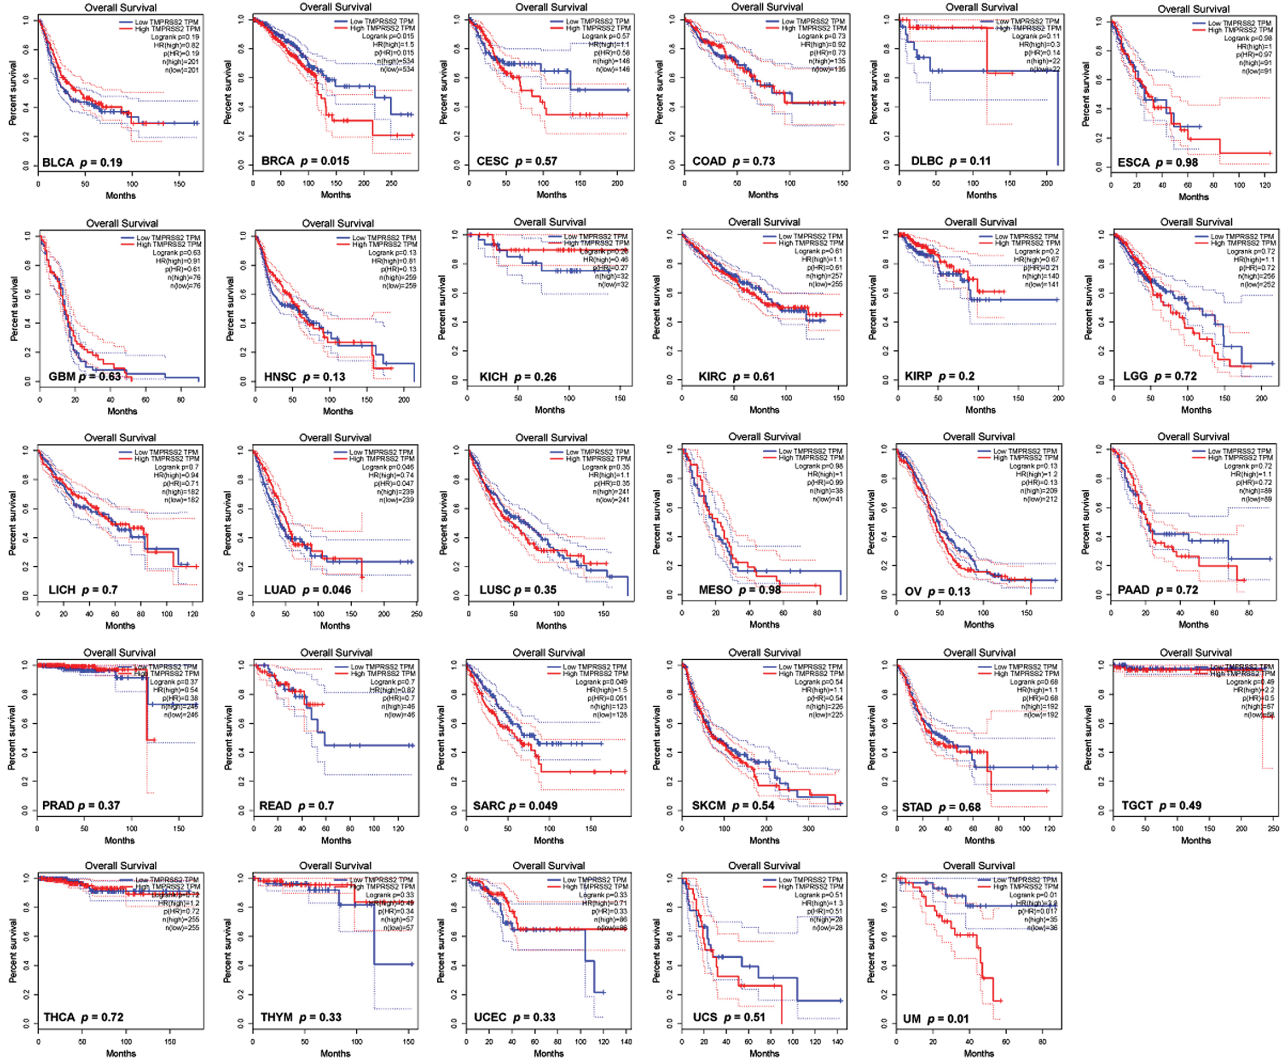

Figure S4. DNA methylation aberration of TMPRSS2 in all tumours. TMPRSS2, transmembrane protease serine 2.

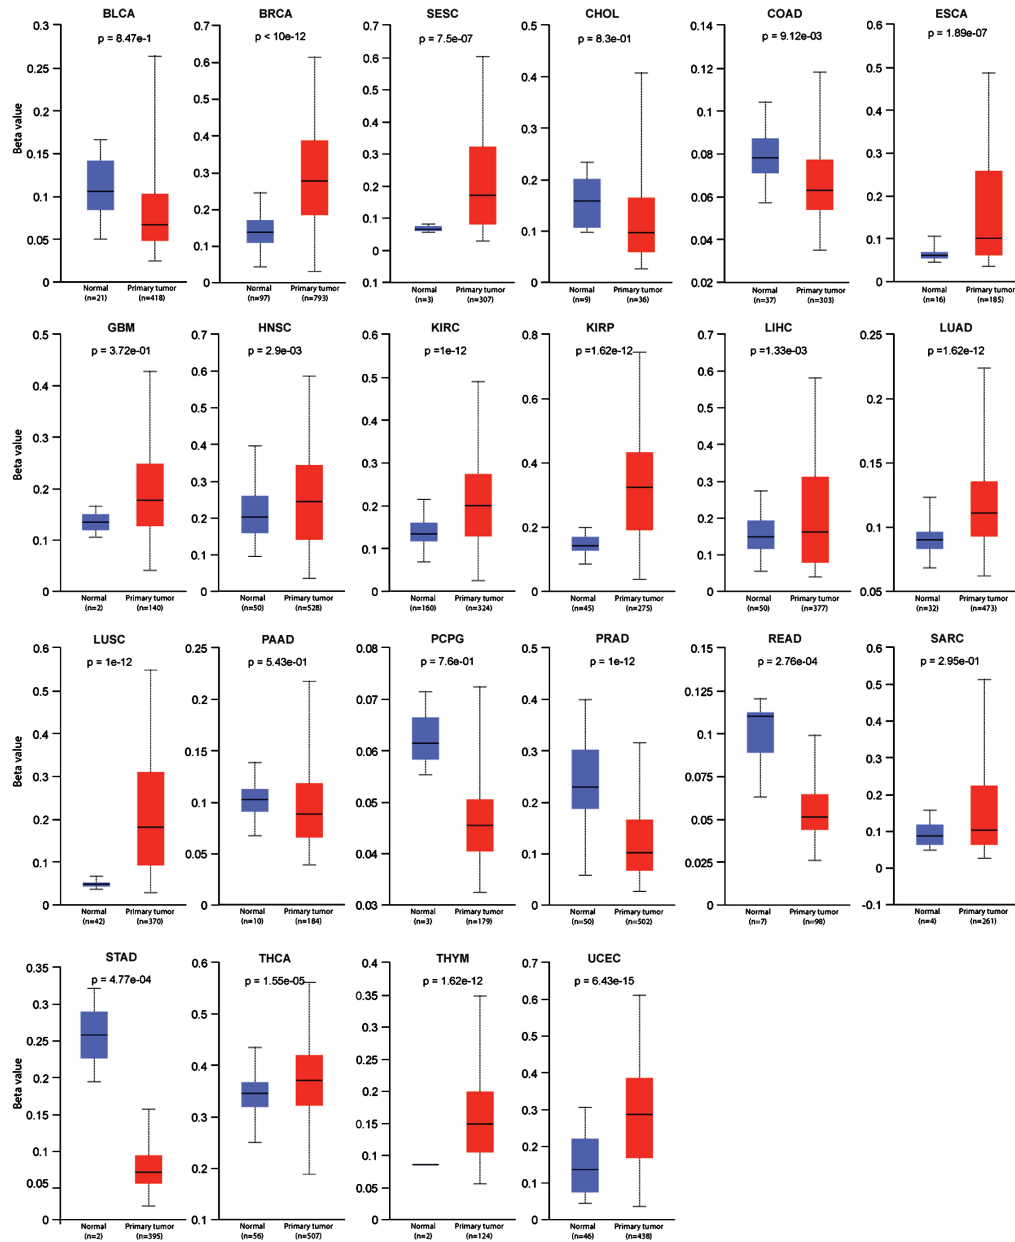

Supplement: Supplementary file 1 [file downloadSupplementary]
